# Supplementary material
Source: PubMed Central journal article supplement (PMC6093243)
Supplement: supp_RA118.003835_137955_1_supp_150257_p9x0h2.pdf [file supp_RA118.003835_137955_1_supp_150257_p9x0h2.pdf]

**Supporting Information for**  
**Evolution of New Delhi metallo- $\beta$ -Lactamase (NDM) in the clinic: Effects of NDM**  
**mutations on stability, zinc affinity, mono-zinc activity**

Zishuo Cheng<sup>1†</sup>, Pei W. Thomas<sup>2†</sup>, Lincheng Ju<sup>3</sup>, Alexander Bergstrom<sup>1</sup>, Kelly Mason<sup>1</sup>, Delaney Clayton<sup>1</sup>, Callie Miller<sup>1</sup>, Christopher R. Bethel<sup>4</sup>, Jamie VanPelt<sup>1</sup>, David L. Tierney<sup>1\*</sup>, Richard Page<sup>1\*</sup>, Robert A. Bonomo<sup>4,5\*</sup>, Walter Fast<sup>2\*</sup>, and Michael W. Crowder<sup>1\*</sup>

**Table S1.** Clinically Isolated Variants of NDM.

| NDM variants | Amino acid substitutions      | Reference    | UniProt ID |
|--------------|-------------------------------|--------------|------------|
| NDM-2        | P28A                          | (1)          | F2YZ26     |
| NDM-3        | D95N                          | (2)          | I3VKD5     |
| NDM-4        | M154L                         | (3)          | H6WZS9     |
| NDM-5        | V88L, M154L                   | (4)          | G3K399     |
| NDM-6        | A233V                         | (5)          | G9JVE6     |
| NDM-7        | D130N, M154L                  | (6)          | J7I0S9     |
| NDM-8        | D130G, M154L                  | (7)          | M1VE66     |
| NDM-9        | E152K                         | (8)          | T2A6Y2     |
| NDM-10       | R32S, G36D, G69S, A74T, G200R | (9)          | S5ZIP8     |
| NDM-11       | M154V                         | From UniProt | A0A0B5ECY2 |
| NDM-12       | M154L, G222D                  | (10)         | A0A024FRL9 |
| NDM-13       | D95N, M154L                   | (11)         | A0A0A8J940 |
| NDM-14       | D130G                         | (12)         | A0A0C5H135 |
| NDM-15       | M154L, A233V                  | From UniProt | A0A0F6ZNP0 |
| NDM-16       | V88L, M154L, A233V            | From UniProt | A0A140IHH4 |
| NDM-17       | V88L, M154L, E170K            | (13)         | A0A1P8C735 |



**Table S2.** Primer Sequences Used for Site-Directed Mutagenesis to Generate NDM Variants

| Position    | Primers for MIC experiment  | Primers for protein over-expression    |
|-------------|-----------------------------|----------------------------------------|
| P28A_F      | CGGGTGCATGgccGGTGAAATCC     | not required                           |
| P28A_R      | CTCAGCATCAATGCAGCGGC        |                                        |
| D95N_F      | CGCCTGGACCaacGACCAGACCG     | CGCCTGGACCaatGACCAGACCG                |
| D95N_R      | GTATCGACCACCAGCACG          | GTATCGACCACCAGCACGC                    |
| M154L_F     | GCAAGAGGGGgctgGTTGCGGCGC    | GCAAGAGGGGgctgGTTGCGGCGC               |
| M154L_R     | GGGGCAAGCTGGTTCGACAAC       | GGGGCAAGCTGGTTCGACAAC                  |
| M154V_F     | GCAAGAGGGGgtgGTTGCGGCGC     | GCAAGAGGGGgtgGTTGCGGCGC                |
| M154V_R     | GGGGCAAGCTGGTTCGACAACG      | GGGGCAAGCTGGTTCGAC                     |
| V88L_F      | CCGCGTGCTGctgGTCGATACCG     | CCGCGTGCTGctgGTCGATACCG                |
| V88L_R      | CCGCCATCCCTGACGATC          | CCGCCATCCCTGACGATC                     |
| A233V_F     | CGCCGCGTCAggtCGCGCGTTTG     | CGCCGCGTCAggtCGCGCGTTTG                |
| A233V_R     | TAGTGCTCAGTGTCCGCATC        | TAGTGCTCAGTGTCCGCATC                   |
| D130N_F     | GGGCGGTATGaatGCGCTGCATG     | GGGCGGTATGaacGCGCTGCATG                |
| D130N_R     | ATCTTGCTCTGATGCGCGTG        | ATCTTGCTCTGATGCGCGTGAGTC               |
| D130G_F     | GGGCGGTATGggtGCGCTGCATG     | GGGCGGTATGggcGCGCTGCATG                |
| D130G_R     | ATCTTGCTCTGATGCGCG          | ATCTTGCTCTGATGCGCGTGAGTCACC            |
| E152K_F     | TGCCCCGCAAaagGGGATGGTTG     | TGCCCCGCAAaagGGGATGGTTG                |
| K152K_R     | AGCTGGTTCGACAACGCATTGGC     | AGCTGGTTCGACAACGCATTGGC                |
| E170K_F     | TGGCTGGGTcaagCCAGCAACCG     | TGGCTGGGTcaagCCAGCAACCG                |
| E170K_R     | TTGGCGGCGAAAGTCAGG          | TTGGCGGCGAAAGTCAGG                     |
| G222D_F     | CGGCAATCTCgacGATGCCGACAC    | CGGCAATCTCgatGATGCCGACA                |
| G222D_R     | AGCGACTTGGCCTTGCTG          | AGCGACTTGGCCTTGCTG                     |
| R32S G36D_F | gattgacCAGCAAATGGAACTGGC    | CTCCGGCTCCgatCAGCAAATGG(for G36D only) |
| R32S G36D_R | gtcgggctGATTCACCGGCATGCA    | GCGCCGCCTGAAAATAC(for G36D only)       |
| G69S A74T_F | gcagtcacgTCCAACGGTTTGATCGTC | gcagtcacgTCCAACGGTTTGATCGTC            |
| G69S A74T_R | cccgaagctCGGCATGTCGAGATAGGA | cccgaagctCGGCATGTCGAGATAGGA            |
| G200R_F     | TGGGATCGACcgcACCGACATCG     | TGGGATCGACcgcACCGACATCG                |
| G200R_R     | ACGGTGATATTGTCACTGGTG       | ACGGTGATATTGTCACTGGTG                  |

**Table S3.** Zinc Content in NDM Variants, As-Purified, Determined by ICP-OES.

| Purified    | Zinc Content |
|-------------|--------------|
| NDM Variant | (Equiv)      |
| NDM-1       | 1.8 ± 0.1    |
| NDM-3       | 1.9 ± 0.1    |
| NDM-4       | 1.6 ± 0.1    |
| NDM-5       | 1.6 ± 0.1    |
| NDM-6       | 1.8 ± 0.1    |
| NDM-7       | 1.6 ± 0.1    |
| NDM-8       | 1.7 ± 0.1    |
| NDM-9       | 1.6 ± 0.1    |
| NDM-11      | 1.9 ± 0.1    |
| NDM-12      | 1.5 ± 0.1    |
| NDM-13      | 1.4 ± 0.1    |
| NDM-14      | 2.0 ± 0.1    |
| NDM-15      | 1.8 ± 0.1    |
| NDM-16      | 1.9 ± 0.1    |
| NDM-17      | 1.9 ± 0.1    |

**Table S4 (a).** Steady-State Kinetic Parameters of NDM Variants for Chromacef Hydrolysis in the Presence of Excess Zinc (10  $\mu\text{M}$ )

| NDM Variant | $k_{\text{cat}}$ ( $\text{s}^{-1}$ ) | $K_{\text{M}}$ ( $\mu\text{M}$ ) | $k_{\text{cat}}/K_{\text{M}}$ ( $\text{M}^{-1}\text{s}^{-1}$ ) |
|-------------|--------------------------------------|----------------------------------|----------------------------------------------------------------|
| NDM-1       | $14.0 \pm 0.4$                       | $0.55 \pm 0.07$                  | $2.5 \times 10^7$                                              |
| NDM-3       | $11.6 \pm 0.3$                       | $1.7 \pm 0.1$                    | $6.8 \times 10^6$                                              |
| NDM-4       | $5.4 \pm 0.1$                        | $0.50 \pm 0.04$                  | $1.1 \times 10^7$                                              |
| NDM-5       | $15.6 \pm 0.8$                       | $2.7 \pm 0.3$                    | $5.8 \times 10^6$                                              |
| NDM-6       | $11.3 \pm 0.2$                       | $1.4 \pm 0.1$                    | $8.1 \times 10^6$                                              |
| NDM-7       | $8.1 \pm 0.4$                        | $2.0 \pm 0.3$                    | $4.1 \times 10^6$                                              |
| NDM-8       | $5.3 \pm 0.1$                        | $1.3 \pm 0.1$                    | $4.1 \times 10^6$                                              |
| NDM-9       | $12.5 \pm 0.4$                       | $1.2 \pm 0.1$                    | $1.0 \times 10^7$                                              |
| NDM-11      | $6.2 \pm 0.1$                        | $0.70 \pm 0.05$                  | $8.9 \times 10^6$                                              |
| NDM-12      | $5.7 \pm 0.1$                        | $0.73 \pm 0.07$                  | $7.8 \times 10^6$                                              |
| NDM-13      | $6.1 \pm 0.2$                        | $1.5 \pm 0.1$                    | $4.1 \times 10^6$                                              |
| NDM-14      | $7.5 \pm 0.2$                        | $0.69 \pm 0.06$                  | $1.1 \times 10^7$                                              |
| NDM-15      | $11.0 \pm 0.4$                       | $1.4 \pm 0.1$                    | $7.9 \times 10^6$                                              |
| NDM-16      | $10.0 \pm 0.2$                       | $0.77 \pm 0.06$                  | $1.3 \times 10^7$                                              |
| NDM-17      | $9.5 \pm 0.2$                        | $0.69 \pm 0.06$                  | $1.4 \times 10^7$                                              |

**Table S4(b).** Steady-State Kinetic Parameters of NDM Variants for Meropenem Hydrolysis in the Presence of Excess Zinc (10  $\mu\text{M}$ )

| NDM Variant | $k_{\text{cat}}$ ( $\text{s}^{-1}$ ) | $K_{\text{M}}$ ( $\mu\text{M}$ ) | $k_{\text{cat}}/K_{\text{M}}$ ( $\text{M}^{-1}\text{s}^{-1}$ ) |
|-------------|--------------------------------------|----------------------------------|----------------------------------------------------------------|
| NDM-1       | $176 \pm 7$                          | $58 \pm 7$                       | $3.0 \times 10^6$                                              |
| NDM-3       | $87 \pm 3$                           | $63 \pm 5$                       | $1.4 \times 10^6$                                              |
| NDM-4       | $141 \pm 3$                          | $75 \pm 4$                       | $1.9 \times 10^6$                                              |
| NDM-5       | $250 \pm 10$                         | $130 \pm 10$                     | $1.9 \times 10^6$                                              |
| NDM-6       | $69 \pm 3$                           | $71 \pm 7$                       | $9.7 \times 10^5$                                              |
| NDM-7       | $141 \pm 3$                          | $90 \pm 5$                       | $1.6 \times 10^6$                                              |
| NDM-8       | $96 \pm 2$                           | $84 \pm 5$                       | $1.1 \times 10^6$                                              |
| NDM-9       | $90 \pm 3$                           | $40 \pm 4$                       | $2.3 \times 10^6$                                              |
| NDM-11      | $71 \pm 3$                           | $75 \pm 8$                       | $9.5 \times 10^5$                                              |
| NDM-12      | $104 \pm 3$                          | $78 \pm 6$                       | $1.3 \times 10^6$                                              |
| NDM-13      | $133 \pm 5$                          | $110 \pm 10$                     | $1.2 \times 10^6$                                              |
| NDM-14      | $75 \pm 3$                           | $72 \pm 7$                       | $1.0 \times 10^6$                                              |
| NDM-15      | $305 \pm 8$                          | $113 \pm 7$                      | $2.7 \times 10^6$                                              |
| NDM-16      | $240 \pm 20$                         | $220 \pm 30$                     | $1.1 \times 10^6$                                              |
| NDM-17      | $123 \pm 4$                          | $121 \pm 8$                      | $1.0 \times 10^6$                                              |

**Table S5.** Dissociation Constants for L-Captopril and Dizinc (II) NDM Variants as Determined by ITC.

| NDM<br>Variants | $K_d$<br>( $\mu\text{M}$ ) | n               |
|-----------------|----------------------------|-----------------|
| NDM-1           | 4 $\pm$ 1                  | 1.0 $\pm$ 0.1   |
| NDM-3           | 5 $\pm$ 2                  | 1.1 $\pm$ 0.6   |
| NDM-4           | 1.9 $\pm$ 0.7              | 1.0 $\pm$ 0.1   |
| NDM-5           | 2.8 $\pm$ 0.5              | 1.0 $\pm$ 0.7   |
| NDM-6           | 3.5 $\pm$ 0.7              | 1.00 $\pm$ 0.05 |
| NDM-7           | 1.6 $\pm$ 0.5              | 1.00 $\pm$ 0.05 |
| NDM-8           | 1.4 $\pm$ 0.9              | 1.02 $\pm$ 0.07 |
| NDM-9           | 1.3 $\pm$ 0.9              | 1.0 $\pm$ 0.8   |
| NDM-11          | 3 $\pm$ 2                  | 1.0 $\pm$ 0.1   |
| NDM-12          | 3 $\pm$ 2                  | 1.0 $\pm$ 0.4   |
| NDM-13          | 3 $\pm$ 0.8                | 1.0 $\pm$ 0.1   |
| NDM-14          | 2 $\pm$ 0.7                | 1.0 $\pm$ 0.1   |
| NDM-15          | 5 $\pm$ 2                  | 1.0 $\pm$ 0.2   |
| NDM-16          | 2 $\pm$ 0.6                | 1.07 $\pm$ 0.06 |
| NDM-17          | 3 $\pm$ 1                  | 1.1 $\pm$ 0.1   |

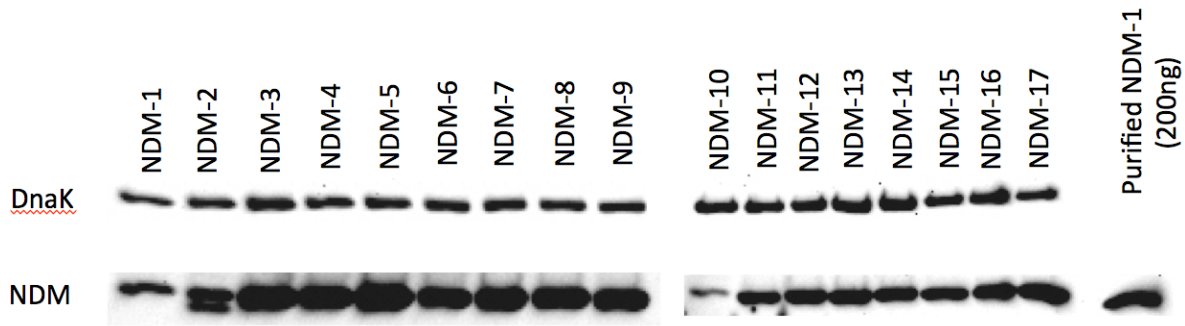

**Figure S1. Immunoblotting of NDM Variants To Gauge Protein Levels.** Immunoblotting was used to evaluate the expression levels of each NDM (1-17) variant. Five-milliliter cultures of *E. coli* DH10B cells containing pHSG-298 phagemids harboring the various  $bla_{NDM}$  variants in Mueller-Hinton (MH) broth containing 50  $\mu\text{g}/\text{mL}$  kanamycin were grown at 37  $^{\circ}\text{C}$  to an optical density at 600 nm ( $\text{OD}_{600}$ ) of 0.8. Fifty-microliter aliquots of whole cells from these cultures were pelleted and frozen overnight. Pellets were resuspended in 20  $\mu\text{L}$  loading dye, separated by SDS-PAGE, and transferred to a polyvinylidene difluoride membrane (Novex, Life Technologies, Carlsbad, CA) by electroblotting. After blocking for 1 h with 5 % nonfat dry milk,  $bla_{NDM}$  presence on the blot was detected by incubation in 5 % nonfat dry milk with anti-NDM-1 polyclonal antibody mouse serum (1/200 dilution) and 1/10,000 dilution of mouse anti-DnaK monoclonal Ab (Enzo Life Sciences) overnight at 4 $^{\circ}\text{C}$ . The membrane was washed four times, 15 min each, in Tris-buffered saline (pH 7.4) containing 0.1% Tween-20 and subsequently incubated in 5 % nonfat dry milk with 1/10,000 dilution of HRP-goat anti-mouse Ab conjugate (Santa Cruz Biotechnology). After four additional washes, the membrane was processed for exposure using the ECL kit (GE Healthcare) and FOTO/AnalystVR FX (Fotodyne).

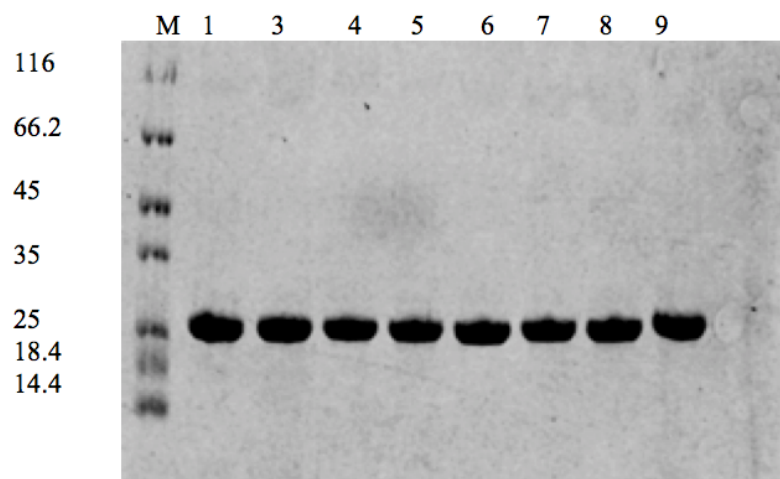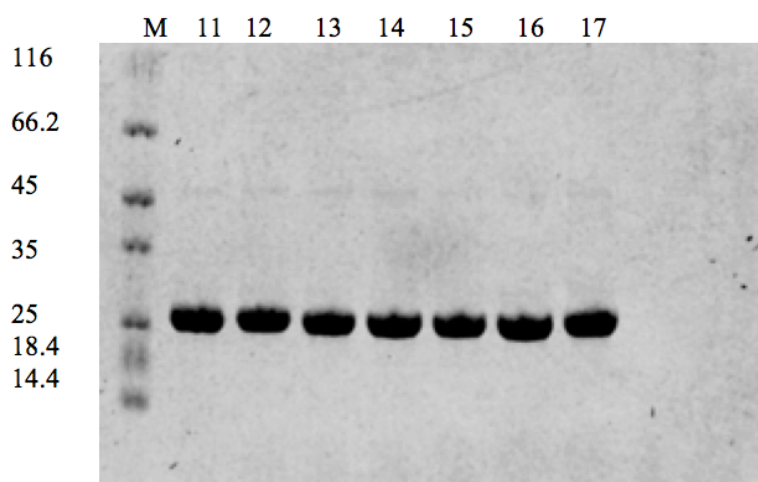

**Figure S2.** SDS-PAGE analysis (12.5%) of purified NDM variants after removal of His-tags. Each variant is labeled by column. The molecular weight markers (M, mass indicated on left in KDa) are EZ-Run Protein Ladder (Fisher).



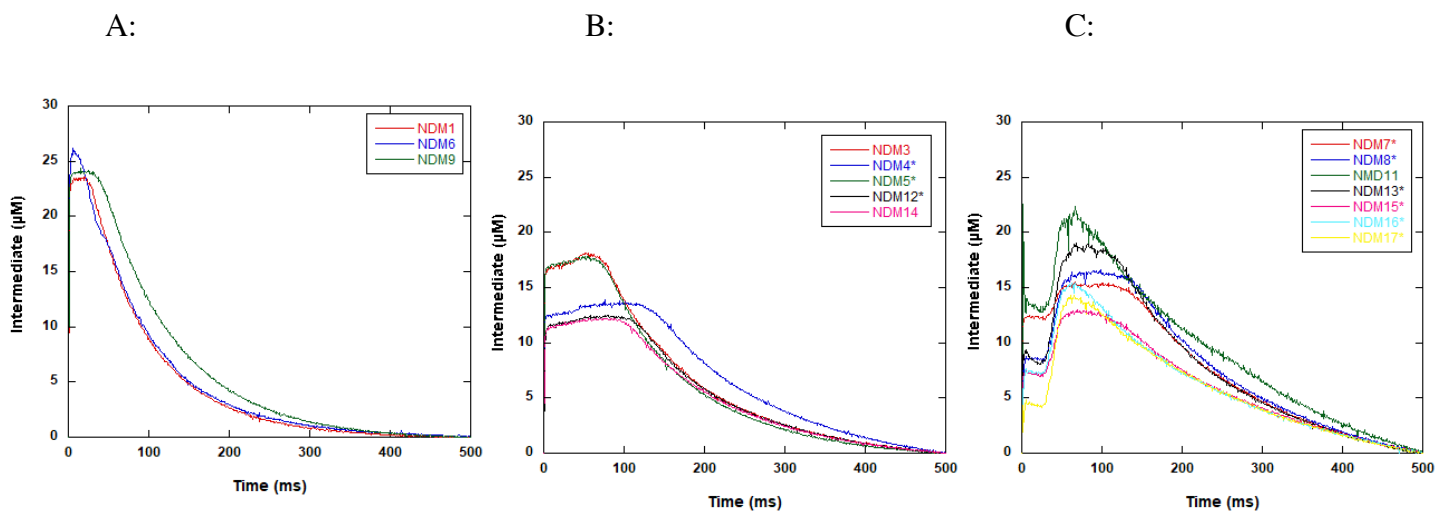

**Figure S3.** Stopped-Flow Kinetics of Chromacef Turnover by Dizinc (II) NDM Variants. Formation of an anionic reaction intermediate at (575 nm) is followed for each NDM-variant and grouped qualitatively by A) variants that show fast formation of the intermediate followed by a slow decay, B) variants that show fast formation of the intermediate that is maintained for a period before decay, and C) variants that show an initial lag period before formation and subsequent decay of the intermediate. Variants containing the M154L mutation are indicated with an asterisk.

Figure S4 Starts below (a multipage figure)

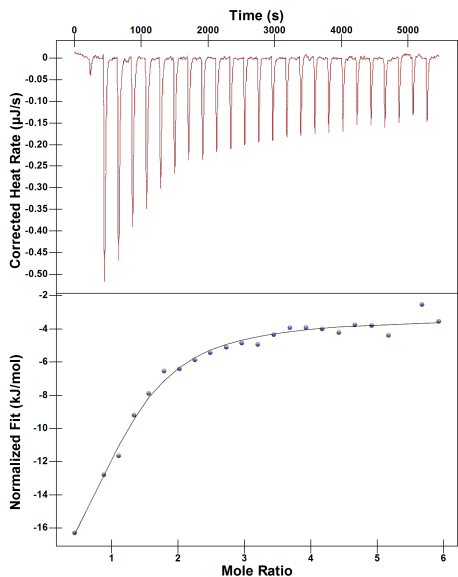

NDM-3:

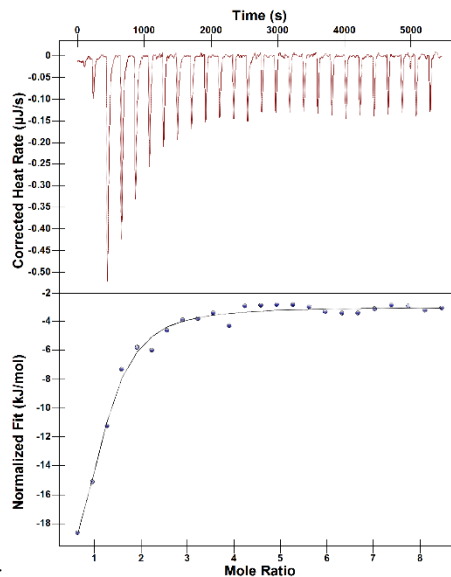

NDM-4:

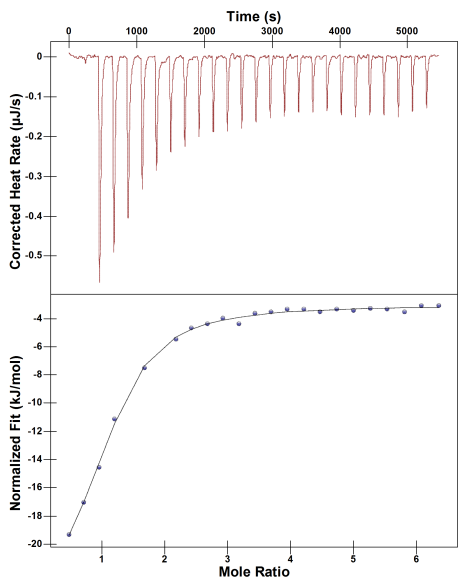

NDM-5:

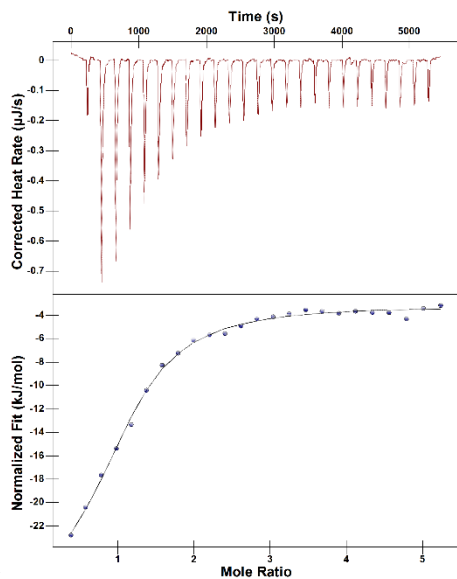

NDM-6:

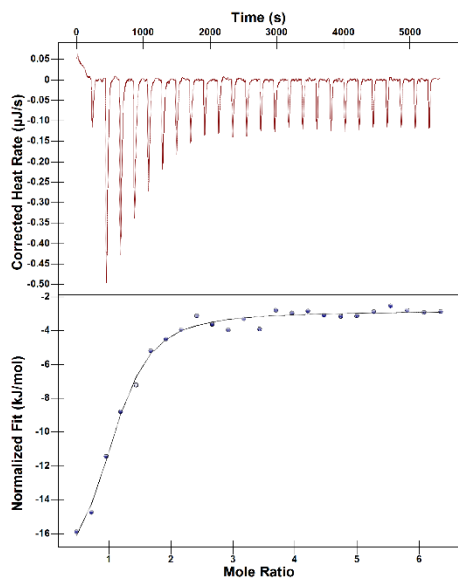

NDM-7:

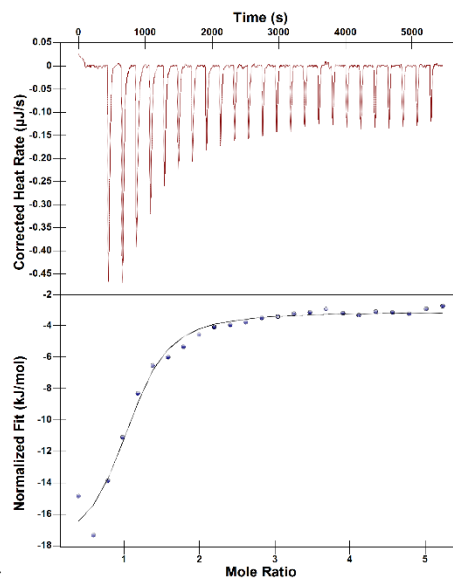

NDM-8:

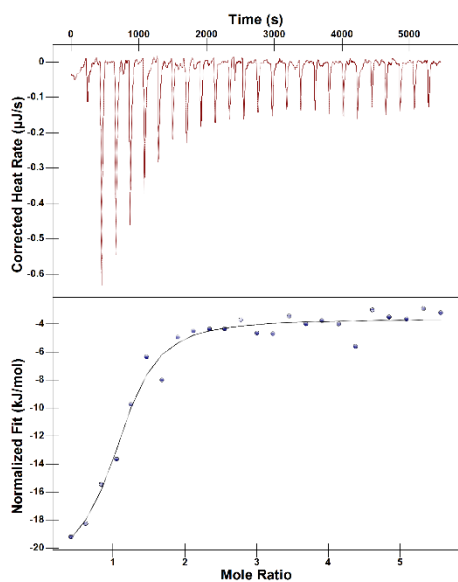

NDM-9:

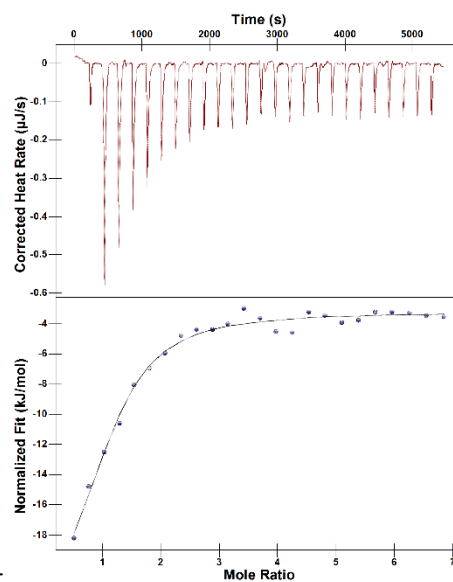

NDM-11:

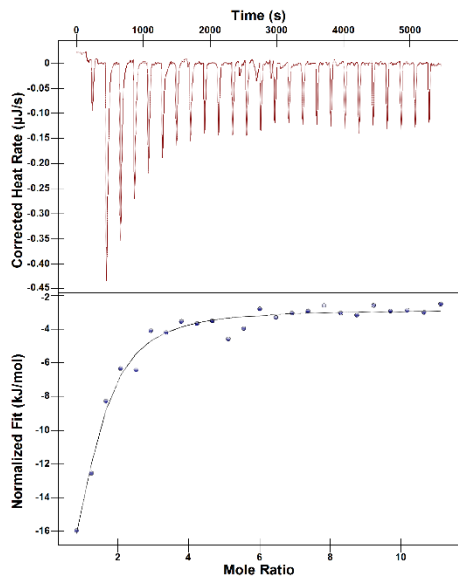

NDM-12:

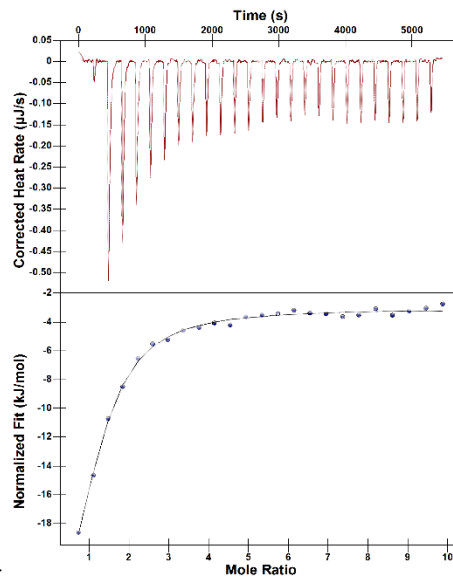

NDM-13:

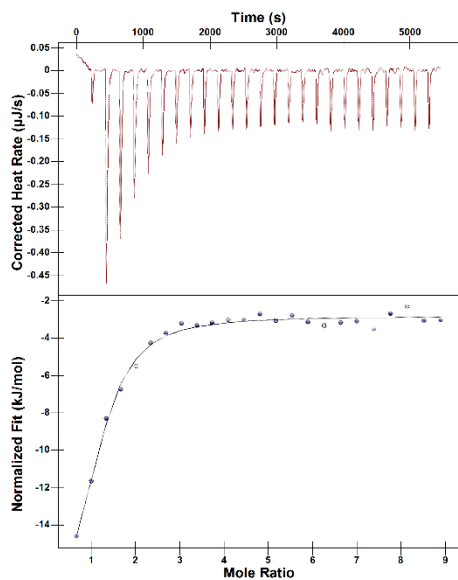

NDM-14:

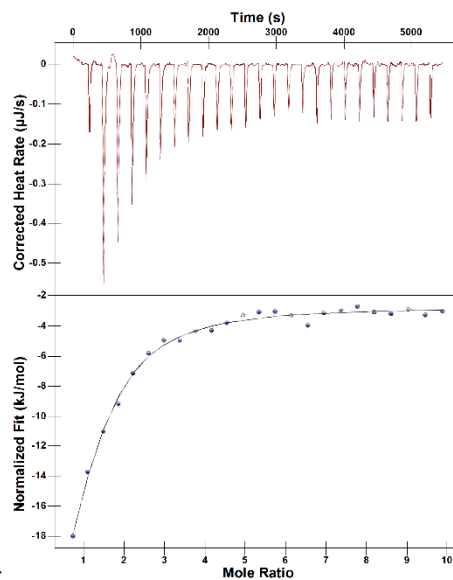

NDM-15:

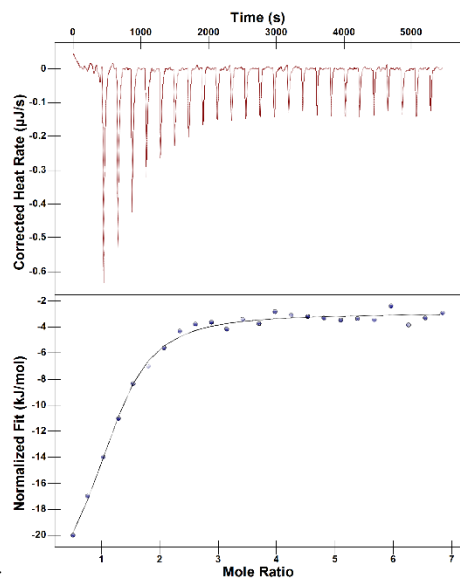

NDM-16:

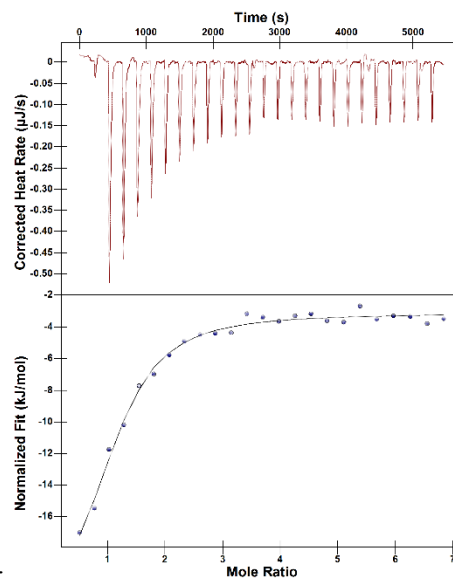

NDM-17:

**Figure S4.** Thermograms and Dissociation Constant Fits for L-Captopril and NDM Variants. Upper panes of each are titration thermograms and lower are the data integration with fitted curves.

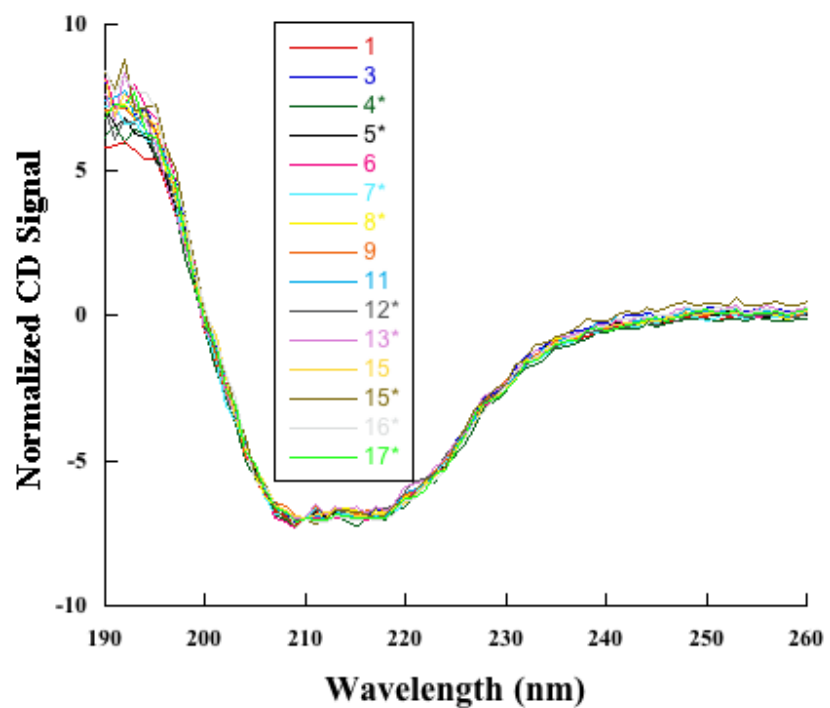

**Figure S5.** Far-UV CD spectra of purified NDM Variants. Data were obtained for each variant (4  $\mu$ M) at room temperature (ca. 25  $^{\circ}$ C) in phosphate buffer (20 mM), at pH 7.

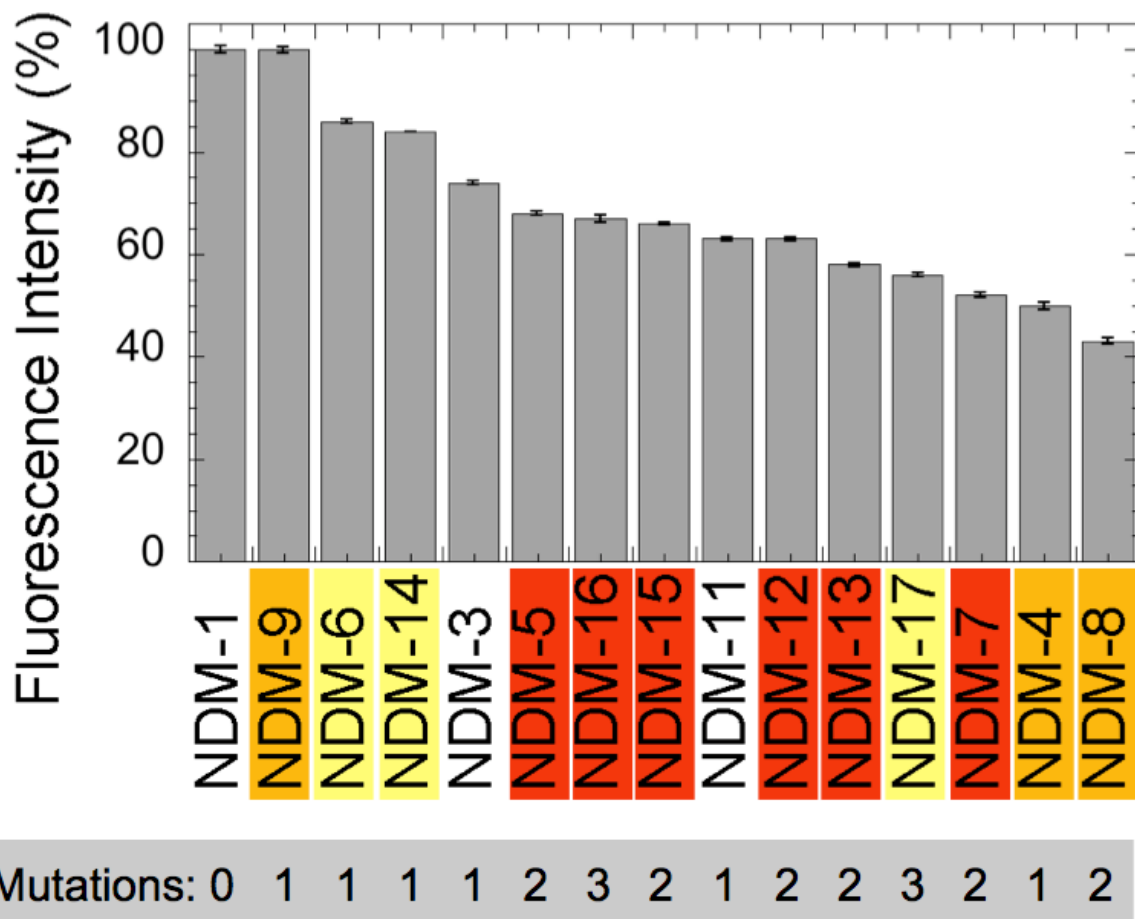

**Figure S6.** Relative Intrinsic Trp Fluorescence of NDM Variants. Each protein sample (2  $\mu$ M) was measured in HEPES buffer (50 mM) at pH 7.5, with data representing the mean of triplicate experiments and error bars depicting standard deviation.

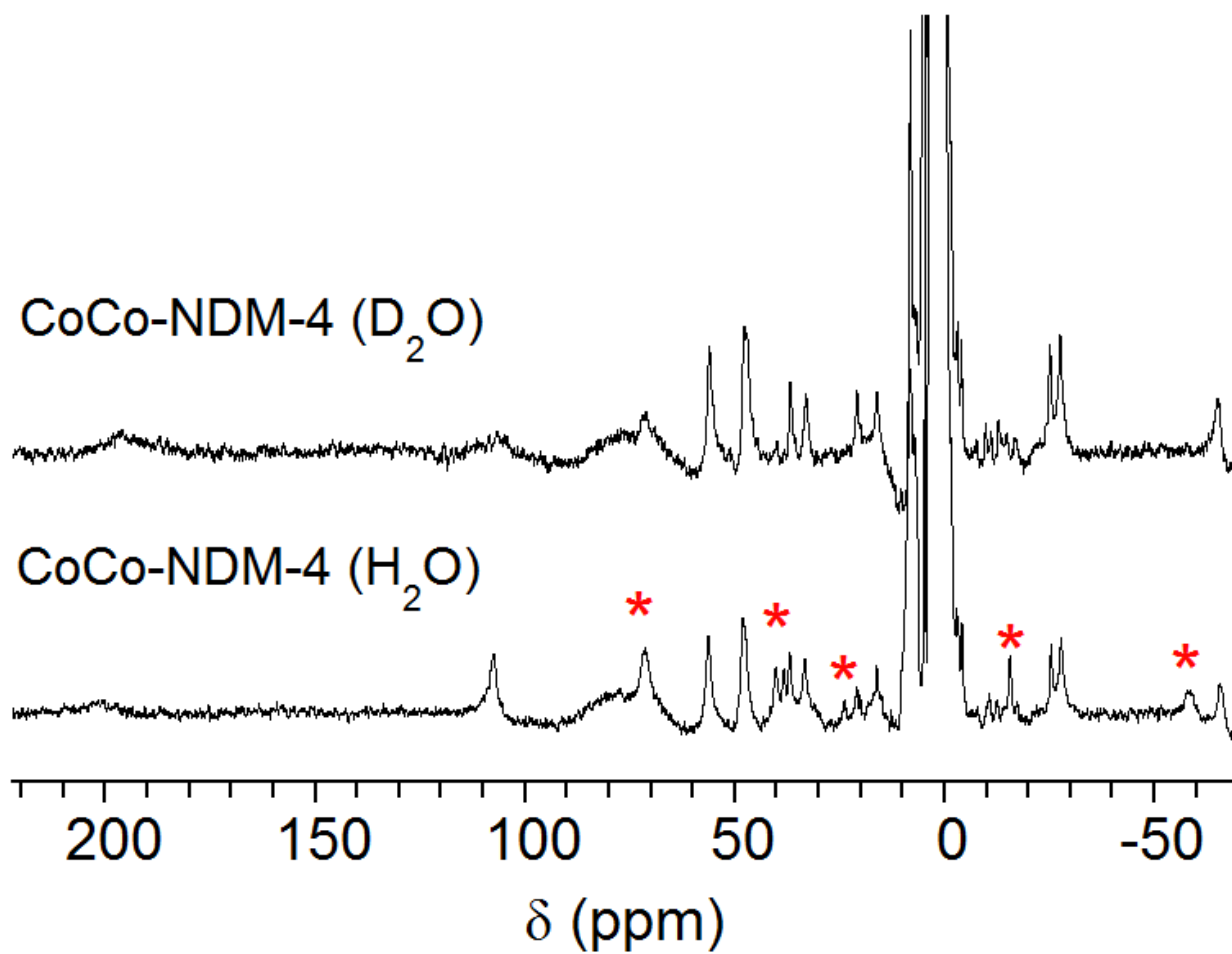

**Figure S7.** Comparison of 300 MHz <sup>1</sup>H NMR of CoCo-NDM-4 in 100 % D<sub>2</sub>O (top) and in 90/10 H<sub>2</sub>O/D<sub>2</sub>O. Exchangeable resonances are marked with a red asterisk.



A:

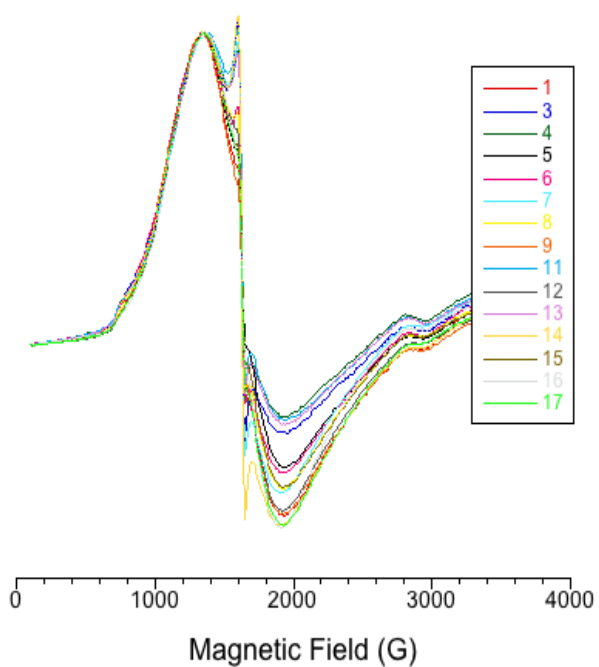

B:

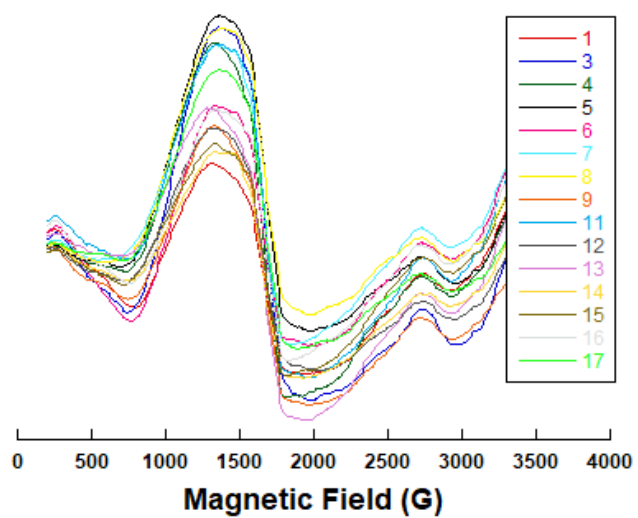

**Figure S8.** EPR Spectra of dicobalt (II) metalloforms of NDM Variants. A) Perpendicular and B) parallel (spectra smoothed using Kaleidegraph) CW-EPR spectra of the metalloforms (0.5 mM), as labeled. Sharp spikes at 1600 G are due to minor contamination by iron.

Figure S9 Starts below (a multipage figure)

NDM-1:

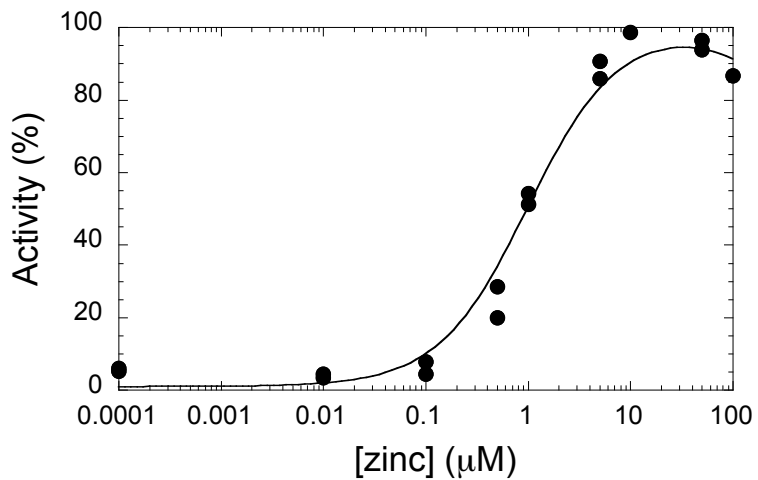

NDM-3:

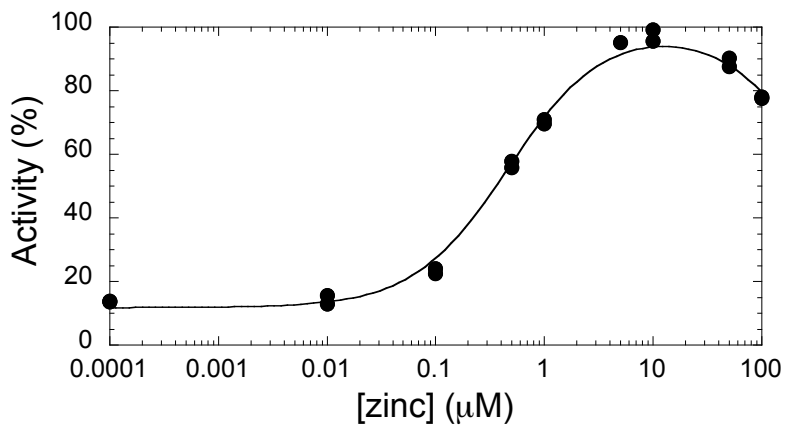

NDM-4:

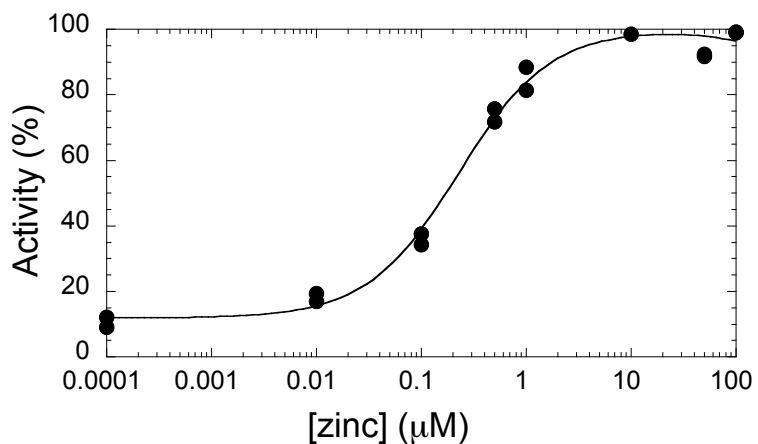

NDM-5:

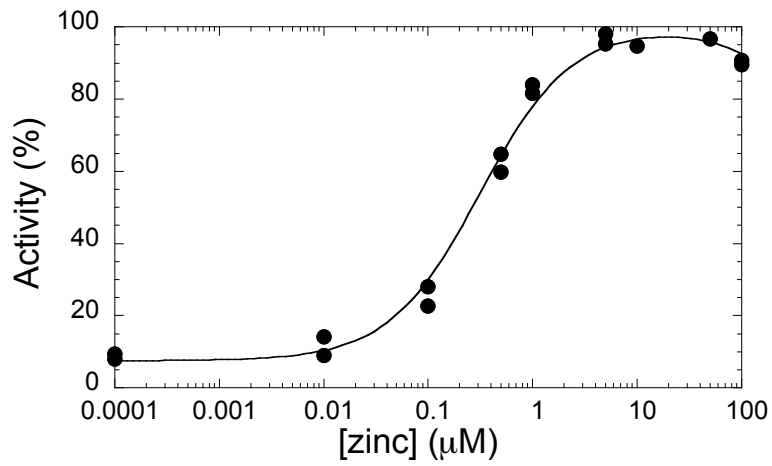

NDM-6:

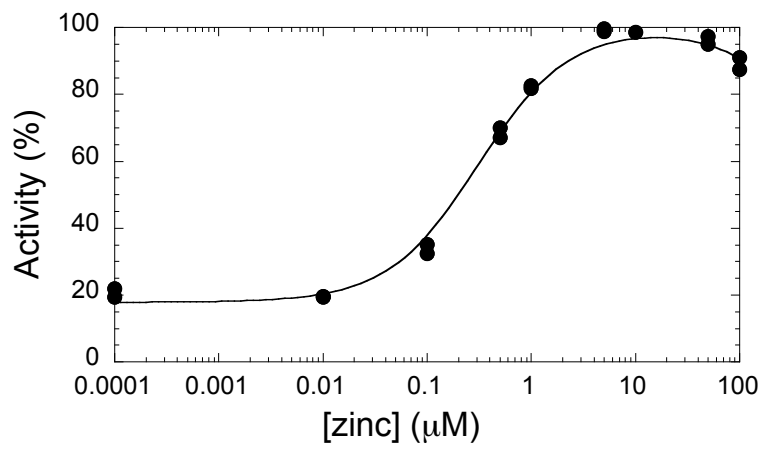

NDM-7:

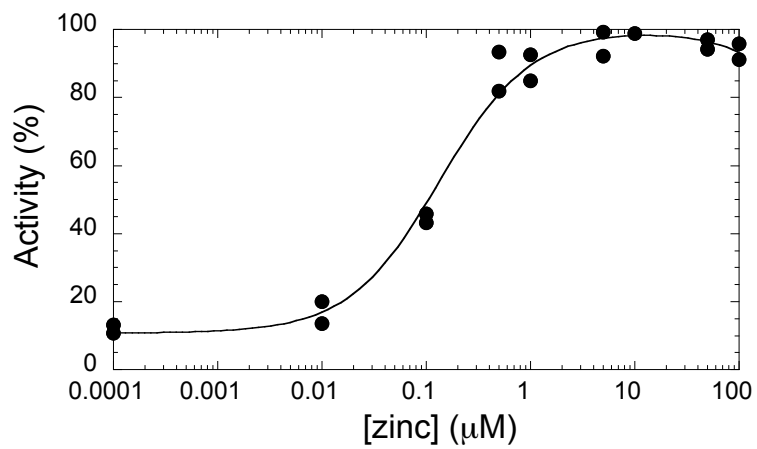

NDM-8:

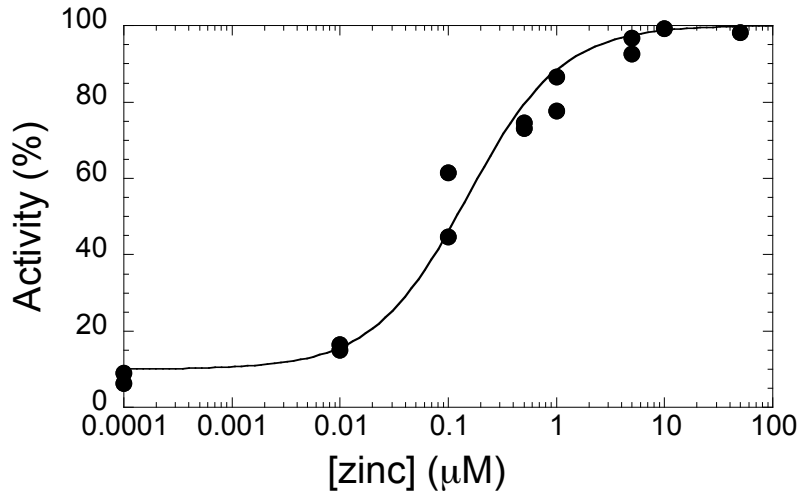

NDM-9:

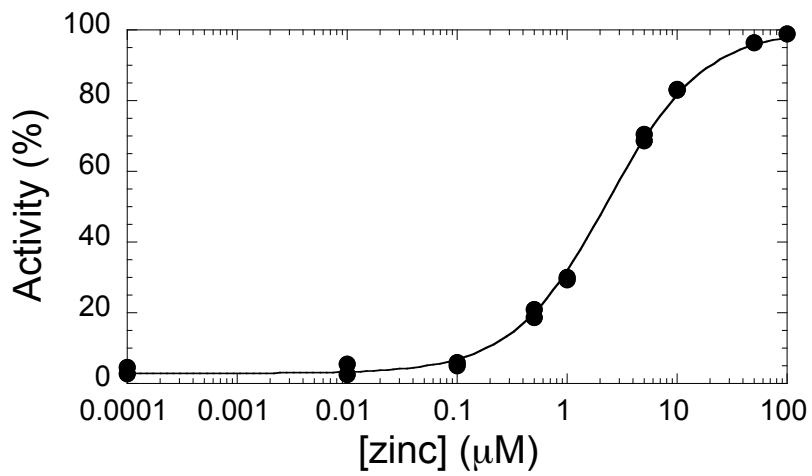

NDM-11:

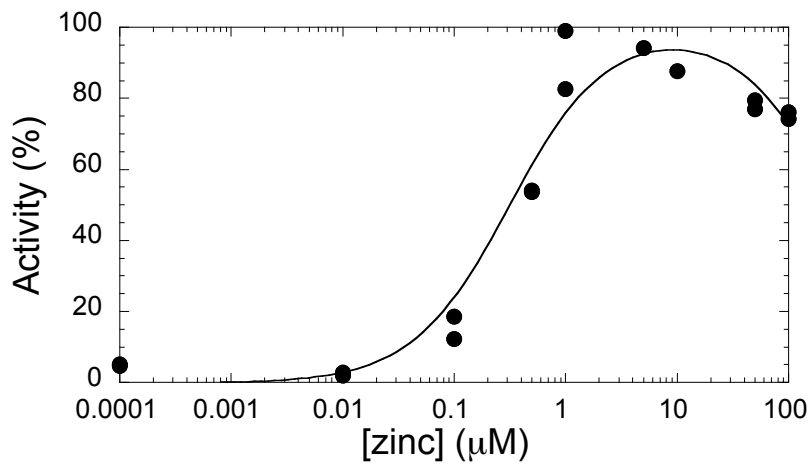

NDM-12:

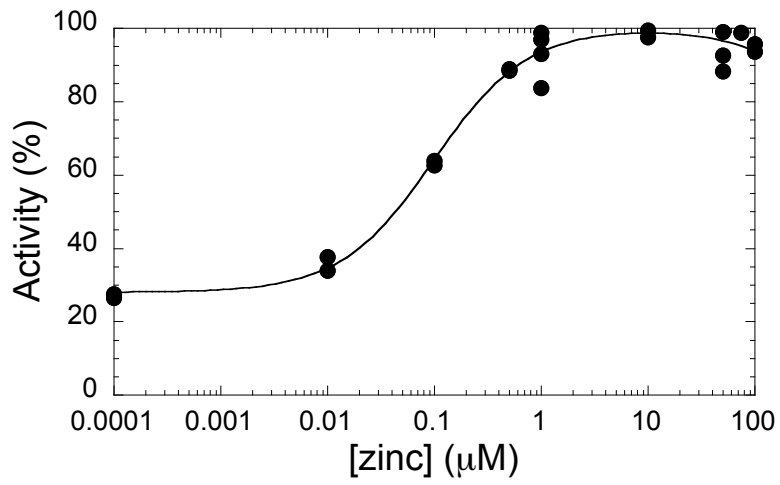

NDM-13:

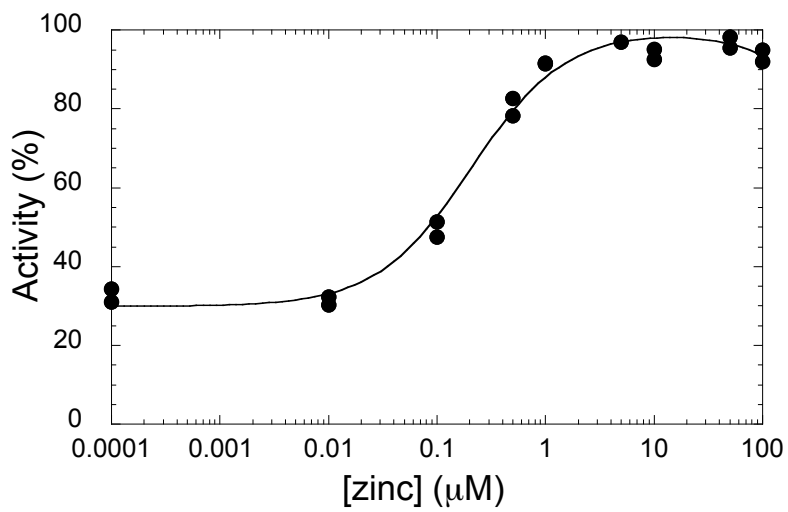

NDM-14:

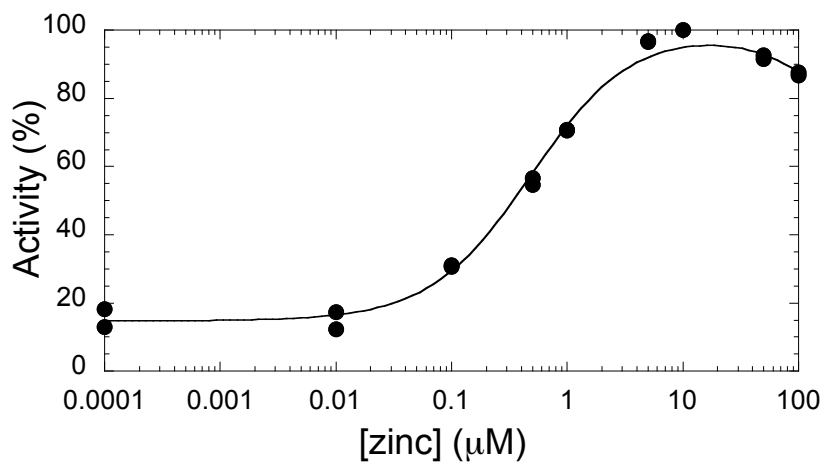

NDM-15:

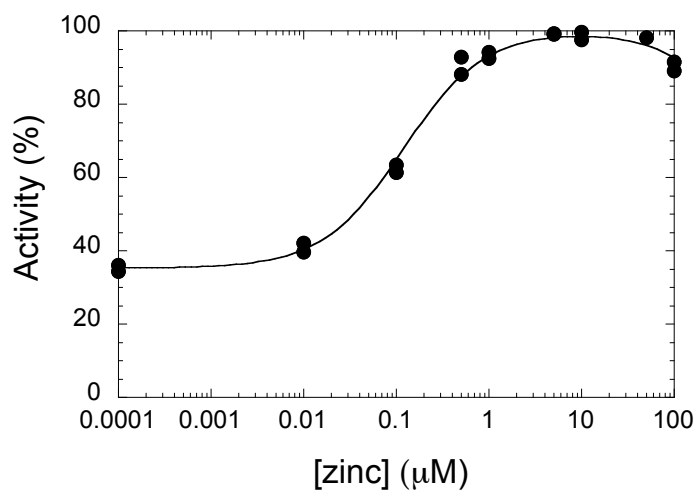

NDM-16:

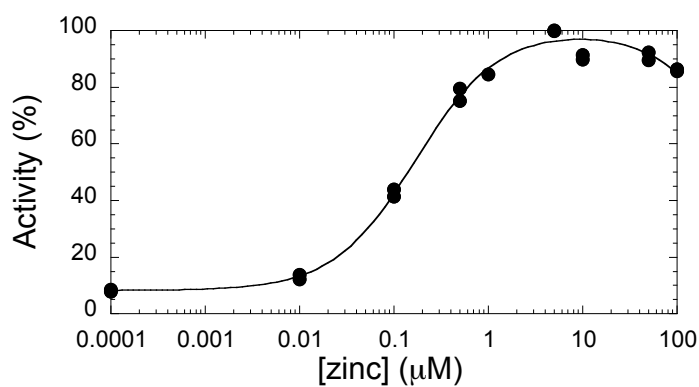

NDM-17:

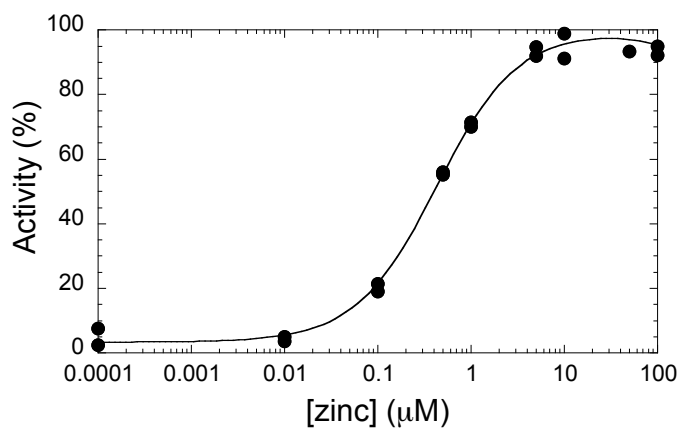

**Figure S9:** Zinc(II) dependence of NDM variants for hydrolysis of Ampicillin. Fits are as described for Figure 10 and Table 4. Each variant used is labeled in the separate plots above.

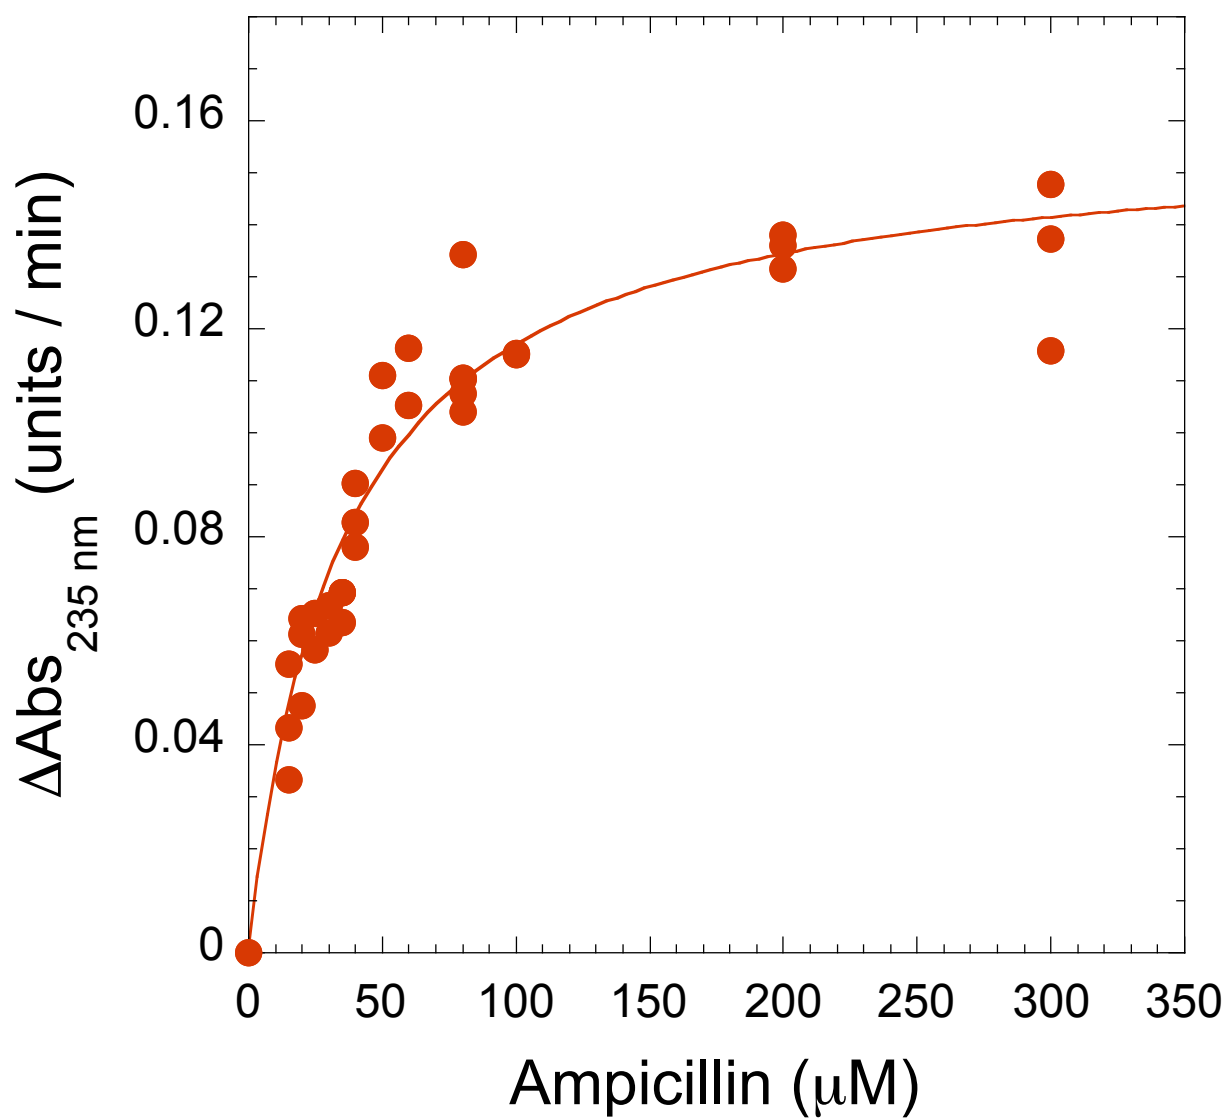

**Figure S10.** Determination of Kinetic Parameters for Monzinc NDM-15. These experiments were completed using 0.1 nM added  $\text{ZnCl}_2$  and are near the limit of detection for this assay in our hands.

Values for  $k_{\text{cat}}$  and  $K_M$  are given in Table 5.

## Supporting Information References

1. Kaase, M., Nordmann, P., Wichelhaus, T. A., Gatermann, S. G., Bonnin, R. A., and Poirel, L. (2011) NDM-2 carbapenemase in *Acinetobacter baumannii* from Egypt. *J Antimicrob Chemother* **66**, 1260-1262
2. Poirel, L., Bonnin, R. A., Boulanger, A., Schrenzel, J., Kaase, M., and Nordmann, P. (2012) Tn125-related acquisition of blaNDM-like genes in *Acinetobacter baumannii*. *Antimicrob Agents Chemother* **56**, 1087-1089
3. Nordmann, P., Boulanger, A. E., and Poirel, L. (2012) NDM-4 metallo-beta-lactamase with increased carbapenemase activity from *Escherichia coli*. *Antimicrob Agents Chemother* **56**, 2184-2186
4. Hornsey, M., Phee, L., and Wareham, D. W. (2011) A novel variant, NDM-5, of the New Delhi metallo-beta-lactamase in a multidrug-resistant *Escherichia coli* ST648 isolate recovered from a patient in the United Kingdom. *Antimicrob Agents Chemother* **55**, 5952-5954
5. Williamson, D. A., Sidjabat, H. E., Freeman, J. T., Roberts, S. A., Silvey, A., Woodhouse, R., Mowat, E., Dyet, K., Paterson, D. L., Blackmore, T., Burns, A., and Heffernan, H. (2012) Identification and molecular characterisation of New Delhi metallo-beta-lactamase-1 (NDM-1)- and NDM-6-producing Enterobacteriaceae from New Zealand hospitals. *Int J Antimicrob Agents* **39**, 529-533
6. Gottig, S., Hamprecht, A. G., Christ, S., Kempf, V. A., and Wichelhaus, T. A. (2013) Detection of NDM-7 in Germany, a new variant of the New Delhi metallo-beta-lactamase with increased carbapenemase activity. *J Antimicrob Chemother* **68**, 1737-1740
7. Tada, T., Miyoshi-Akiyama, T., Dahal, R. K., Sah, M. K., Ohara, H., Kirikae, T., and Pokhrel, B. M. (2013) NDM-8 metallo-beta-lactamase in a multidrug-resistant *Escherichia coli* strain isolated in Nepal. *Antimicrob Agents Chemother* **57**, 2394-2396
8. Wang, X., Li, H., Zhao, C., Chen, H., Liu, J., Wang, Z., Wang, Q., Zhang, Y., He, W., Zhang, F., and Wang, H. (2014) Novel NDM-9 metallo-beta-lactamase identified from a ST107 *Klebsiella pneumoniae* strain isolated in China. *Int J Antimicrob Agents* **44**, 90-91
9. Khajuria, A., Praharaj, A. K., Kumar, M., and Grover, N. (2016) Presence of a novel variant NDM-10, of the New Delhi metallo-beta-lactamase in a *Klebsiella pneumoniae* isolate. *Indian J Med Microbiol* **34**, 121-123
10. Tada, T., Shrestha, B., Miyoshi-Akiyama, T., Shimada, K., Ohara, H., Kirikae, T., and Pokhrel, B. M. (2014) NDM-12, a novel New Delhi metallo-beta-lactamase variant from a carbapenem-resistant *Escherichia coli* clinical isolate in Nepal. *Antimicrob Agents Chemother* **58**, 6302-6305
11. Shrestha, B., Tada, T., Miyoshi-Akiyama, T., Shimada, K., Ohara, H., Kirikae, T., and Pokhrel, B. M. (2015) Identification of a novel NDM variant, NDM-13, from a multidrug-resistant *Escherichia coli* clinical isolate in Nepal. *Antimicrob Agents Chemother* **59**, 5847-5850
12. Zou, D., Huang, Y., Zhao, X., Liu, W., Dong, D., Li, H., Wang, X., Huang, S., Wei, X., Yan, X., Yang, Z., Tong, Y., Huang, L., and Yuan, J. (2015) A novel New Delhi metallo-beta-lactamase variant, NDM-14, isolated in a Chinese Hospital possesses increased enzymatic activity against carbapenems. *Antimicrob Agents Chemother* **59**, 2450-2453
13. Liu, Z., Wang, Y., Walsh, T. R., Liu, D., Shen, Z., Zhang, R., Yin, W., Yao, H., Li, J., and Shen, J. (2017) Plasmid-Mediated Novel blaNDM-17 Gene Encoding a



Carbapenemase with Enhanced Activity in a Sequence Type 48 Escherichia coli Strain.  
*Antimicrob Agents Chemother* **61**
